# Supplementary material for: SARS-CoV-2 Infection in Cities from the Southern Region of Bahia State, Brazil: Analysis of Variables Associated in Both Individual and Community Level
Source: MDPI journal article supplement (doi:10.3390/v15071583), 2023-07-20
Supplement: s1 [file s1]

Supplementary Material

# SARS-CoV-2 Infection in Cities from the Southern Region of Bahia State, Brazil: Analysis of Variables Associated in Both Individual and Community Level

**Table S1.** Geographical location of cities from Southern Region of Bahia State includes in the study.

| ID | City                      | Geographical Location         | Population <sup>a</sup> | Total Samples |
|----|---------------------------|-------------------------------|-------------------------|---------------|
| 1  | Almadina                  | 14° 42' 18" S - 39° 38' 13" W | 6.357                   | 43            |
| 2  | Arataca                   | 15° 15' 48" S - 39° 24' 52" W | 10.392                  | 130           |
| 3  | Barro Preto               | 14° 47' 34" S - 39° 27' 58" W | 6.453                   | 4             |
| 4  | Belo Campo                | 11° 33' 0" S - 41° 37' 0" W   | 16.021                  | 1             |
| 5  | Buerarema                 | 14° 56' 50" S - 39° 18' 16" W | 18.605                  | 651           |
| 6  | Camacan                   | 15° 24' 51" S - 39° 30' 4" W  | 31.472                  | 358           |
| 7  | Camamu                    | 13° 56' 29" S - 39° 7' 17" W  | 35.180                  | 1             |
| 8  | Coaraci                   | 14° 38' 29" S - 39° 33' 1" W  | 20.964                  | 5             |
| 9  | Floresta Azul             | 14° 50' 52" S - 39° 39' 23" W | 10.660                  | 585           |
| 10 | Gandu                     | 13° 44' 18" S - 39° 28' 49" W | 30.336                  | 1             |
| 11 | Ibicaraí                  | 14° 50' 29" S - 39° 35' 34" W | 24.272                  | 8             |
| 12 | Ibicuí                    | 14° 49' 48" S - 39° 58' 58" W | 15.785                  | 2             |
| 13 | Ilhéus                    | 14° 47' 50" S - 39° 2' 8" W   | 184.236                 | 287           |
| 14 | Itabuna                   | 14° 47' 21" S - 39° 16' 40" W | 204.667                 | 131           |
| 15 | Itaju do Colônia          | 15° 8' 34" S - 39° 43' 35" W  | 7.309                   | 1             |
| 16 | Itajuípe                  | 14° 41' 7" S - 39° 21' 52" W  | 21.081                  | 1108          |
| 17 | Itaparica                 | 12° 55' 2" S - 38° 39' 17" W  | 20.725                  | 1             |
| 18 | Itapé                     | 14° 52' 35" S - 39° 25' 59" W | 10.995                  | 616           |
| 19 | Itapetinga                | 15° 15' 23" S - 40° 15' 27" W | 68.273                  | 2             |
| 20 | Itapitanga                | 14° 24' 58" S - 39° 32' 45" W | 10.207                  | 222           |
| 21 | Itororó                   | 15° 7' 3" S - 40° 4' 5" W     | 19.914                  | 3             |
| 22 | Ituberá                   | 13° 43' 57" S - 39° 9' 2" W   | 26.591                  | 2             |
| 23 | Jussari                   | 15° 10' 10" S - 39° 29' 18" W | 6.474                   | 259           |
| 24 | Maraú                     | 15° 10' 10" S - 39° 29' 18" W | 19.101                  | 2             |
| 25 | Mascote                   | 15°33'47.02"S - 39°18'9"W     | 14.640                  | 2             |
| 26 | Pau Brasil                | 15°27'51.01"S - 39°39'4"W     | 10.852                  | 524           |
| 27 | Presidente Tancredo Neves | 13° 27' 14" S - 39° 25' 15" W | 23.845                  | 2             |
| 28 | Salvador                  | 12° 58' 13" S - 38° 30' 45" W | 2.675.656               | 2             |
| 29 | Santa Cruz da Vitória     | 14° 57' 42" S - 39° 48' 37" W | 6.673                   | 1             |
| 30 | Santa Luzia               | 10° 58' 60" S - 45° 33' 0" W  | 13.344                  | 5             |
| 31 | Ubaitaba                  | 14° 18' 17" S - 39° 19' 24" W | 20.691                  | 3             |
| 32 | Una                       | 15° 16' 11" S - 39° 4' 10" W  | 24.110                  | 4             |
| 33 | Uruçuca                   | 14° 35' 12" S - 39° 17' 29" W | 19.837                  | 3             |
| 34 | Vitória da Conquista      | 14° 51' 53" S - 40° 50' 13" W | 306.866                 | 1             |

<sup>a</sup> Population according to Instituto Brasileiro de Geografia e Estatística (IBGE) census 2010 (www.ibge.gov.br accessed on 16 June 2023).

**Table S2.** *P* values of the Pearson correlation matrix.

|                          | <i>D<sub>i</sub></i> | <i>P<sub>i</sub></i> | <i>HDI<sub>c</sub></i> | <i>AWS<sub>c</sub></i> | <i>SR<sub>6-14</sub></i> |
|--------------------------|----------------------|----------------------|------------------------|------------------------|--------------------------|
| <i>D<sub>i</sub></i>     | -                    | 0.0935               | 0.0442                 | 0.0137                 | 0.6584                   |
| <i>P<sub>i</sub></i>     | 0.0935               | -                    | 0.0339                 | 0.8680                 | 0.5176                   |
| <i>HDI<sub>c</sub></i>   | 0.0442               | 0.0339               | -                      | 0.3174                 | 0.5113                   |
| <i>AWS<sub>c</sub></i>   | 0.0137               | 0.8680               | 0.3174                 | -                      | 0.5242                   |
| <i>SR<sub>6-14</sub></i> | 0.6584               | 0.5176               | 0.5113                 | 0.5242                 | -                        |

*D<sub>i</sub>*, Demand index; *P<sub>i</sub>*, Positivity index; *HDI<sub>c</sub>*, Human development index; *AWS<sub>c</sub>*, Average worker salary; *SR<sub>6-14</sub>*, Schooling rate between 6-14 years-old.
